# Supplementary material for: Architectures of somatic genomic rearrangement in human cancer amplicons at sequence-level resolution
Source: HighWire-hosted journal article supplement (doi:10.1101/gr.6522707), 2007-08-03
Supplement: Supplementary_Fig_3.pdf [file Supplementary_Fig_3.pdf]

# Supplementary Figure 3

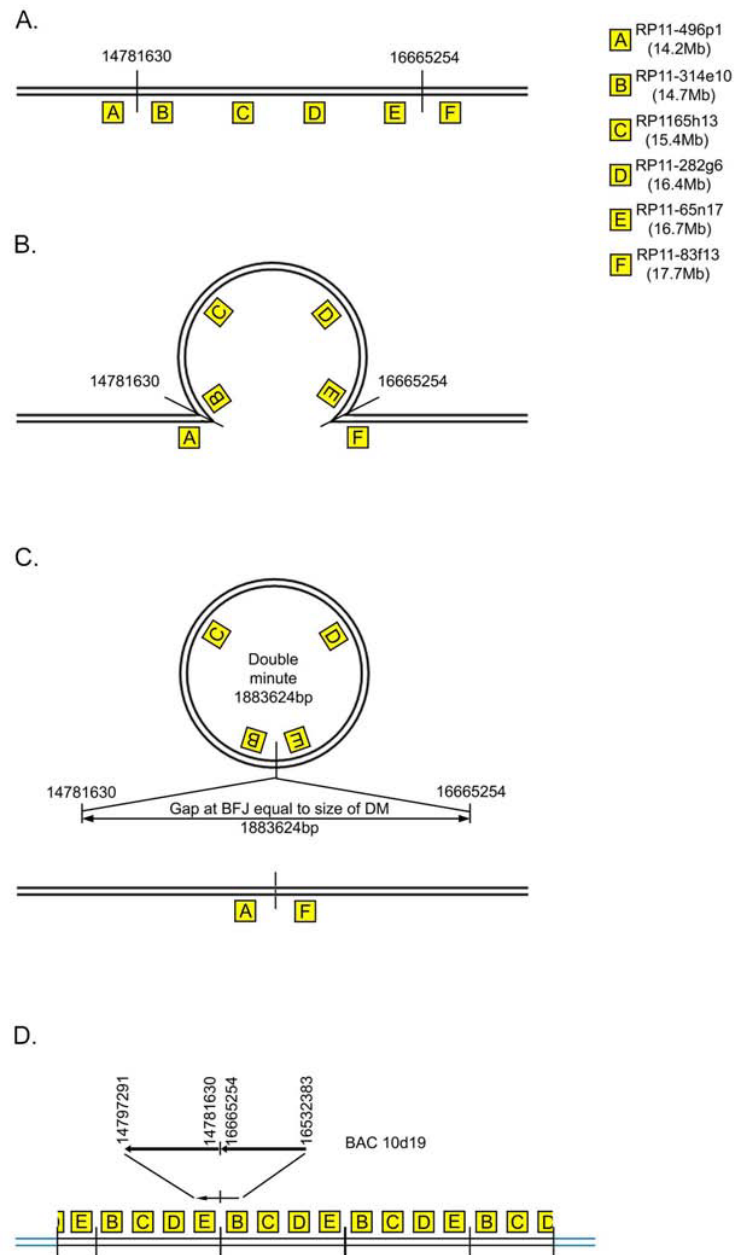

Schematic representation of double minute formation via DNA excision. The yellow boxes represent a subset of BAC probes used to map the amplicon in NCI-H1770. The chromosomal position are those for the bases flanking the breakage-fusion junction in BACs 10d19 and 17g13. A) A normal chromosome 2. B) Looping out of the region of genomic DNA that will ultimately be incorporated into the double minute chromosome. C) Excision of the DNA loop to form a self replicating double minute chromosome together with a 'scarred' copy of chromosome 2. D) After amplification of the double minute chromosome by unequal segregation during cell division the double minute chromosome must have reinserted into chromosome 12 shown in blue. The genomic coordinates for the recombinant BAC 10d19 are shown. FISH experiments identified 2 copies of chromosome 2 using probes RP11-496p1 (A) and RP11-83f13 (F). Probes RP11-314e10 (B), RP11-165h13 (C), RP11-282g6 (D) and RP11-65n17 (E) highlighted the HSR in NCI-H1770 together with one copy of chromosome 2.
