# Supplementary material for: Architectures of somatic genomic rearrangement in human cancer amplicons at sequence-level resolution
Source: HighWire-hosted journal article supplement (doi:10.1101/gr.6522707), 2007-08-03
Supplement: Supplementary_Table_4.pdf [file Supplementary_Table_4.pdf]

|                                 | <i>ERBB2</i><br>copy<br>number | 1 <sup>st</sup> breakage<br>fusion<br>junction | 2 <sup>nd</sup> breakage<br>fusion junction | 3 <sup>rd</sup> breakage<br>fusion junction | 4 <sup>th</sup> breakage<br>fusion junction | 5 <sup>th</sup> breakage<br>fusion junction | 6 <sup>th</sup> breakage<br>fusion junction | 7 <sup>th</sup> breakage<br>fusion junction |
|---------------------------------|--------------------------------|------------------------------------------------|---------------------------------------------|---------------------------------------------|---------------------------------------------|---------------------------------------------|---------------------------------------------|---------------------------------------------|
| Diploid genome                  | 1+1                            | 0                                              | 0                                           | 0                                           | 0                                           | 0                                           | 0                                           | 0                                           |
| 1 <sup>st</sup> round BFB cycle | 2+1                            | 1                                              | 0                                           | 0                                           | 0                                           | 0                                           | 0                                           | 0                                           |
| 2 <sup>nd</sup> round BFB cycle | 4+1                            | 2                                              | 1                                           | 0                                           | 0                                           | 0                                           | 0                                           | 0                                           |
| 3 <sup>rd</sup> round BFB cycle | 8+1                            | 4                                              | 2                                           | 1                                           | 0                                           | 0                                           | 0                                           | 0                                           |
| 4 <sup>th</sup> round BFB cycle | 16+1                           | 8                                              | 4                                           | 2                                           | 1                                           | 0                                           | 0                                           | 0                                           |
| 5 <sup>th</sup> round BFB cycle | 32+1                           | 16                                             | 8                                           | 4                                           | 2                                           | 1                                           | 0                                           | 0                                           |
| 6 <sup>th</sup> round BFB cycle | 64+1                           | 32                                             | 16                                          | 8                                           | 4                                           | 2                                           | 1                                           | 0                                           |
| 7 <sup>th</sup> round BFB cycle | 128+1                          | 64                                             | 32                                          | 16                                          | 8                                           | 4                                           | 2                                           | 1                                           |
| Expected representation         | 13.7                           | 6.7                                            | 3.3                                         | 1.7                                         | 0.8                                         | 0.4                                         | 0.2                                         | 0.1                                         |
| Actual representation           | 14.36                          | 7                                              | 1                                           | 1                                           | 0                                           | 0                                           | 0                                           | 0                                           |

Supplementary Table 4. Estimated and actual copy number of *ERBB2* and breakage-fusion junctions through seven rounds of the break-fusion-bridge cycle. The expected copy numbers of *ERBB2* and each breakage-fusion junction are estimated from the total genome coverage of the BAC end-sequence library (0.105-fold coverage) and the amplification level of *ERBB2*, estimated at 65.6 fold over a diploid genome (the average from the estimates using qPCR and the clone distribution from the BAC end-sequence data). The actual representation of *ERBB2* in the BAC library is calculated from the total coverage of the genomic footprint of *ERBB2* in the BAC end-sequence library (data not shown). 12 clones contained a complete copy of the *ERBB2* gene with a further five clones containing partial sequence accounting for 2.36 copies of the genomic footprint of *ERBB2*, giving a total of 14.36 copies.
